# Supplementary material for: Impact of pharmacy services on initial clinical outcomes and medication adherence among veterans with uncontrolled diabetes
Source: Springer Nature journal article supplement (doi:10.1186/s12913-018-3665-x), 2018-11-14
Supplement: MOESM1 [file 16271772]

## Additional File 1: Diagnosis Codes

### Diagnoses (ICD-9 CM)

HIV: 042-044.9, V08, 795.71

Malignant cancer: 140-172.9, 174-195.8, 200-208.9

Retinopathy: 250.5, 362.0x

Neuropathy: 250.6, 357.2

Foot ulcer: 707.1x

Nephropathy: 250.4x

End-stage renal disease: 585.6

Cerebrovascular disease: 430-438

Ischemic stroke: 434.x, 436.x

Transient ischemic attack: 435.x

Myocardial infarction: 410-410.9, 412

Peripheral arterial disease: 440.0-440.9, 443.x, 38.0, 38.1, 39.50, 39.22, 39.24-39.26, 29.28

Chronic obstructive pulmonary disease: 490-496, 500-505, 506.4

Congestive heart failure: 428-428.9

Hypoglycemia: 251.2, 250.8
